# Supplementary material for: Co3O4 nanocrystal ink printed on carbon fiber paper as a large-area electrode for electrochemical water splitting
Source: Royal Society of Chemistry journal article supplement (doi:10.1039/c5cc01080b), 2015-01-01
Supplement: c5cc01080b1.pdf [file c5cc01080b1.pdf]

## Electronic Supplementary Information

# **Co<sub>3</sub>O<sub>4</sub> nanocrystals ink printing on carbon fiber paper as large-area electrode for electrochemical water splitting**

Shichao Du,<sup>1</sup> Zhiyu Ren,<sup>2\*</sup> Jun Zhang,<sup>2</sup> Jun Wu,<sup>2</sup> Wang Xi,<sup>2</sup> Jiaqing Zhu<sup>2</sup> & Honggang Fu<sup>1,2\*</sup>

<sup>1</sup> *Institute of Theoretical chemistry, Jilin University, 130023 Changchun P. R. China.*

<sup>2</sup> *Key Laboratory of Functional Inorganic Material Chemistry, Ministry of Education of the People's Republic of China; School of Chemistry and Materials Science, Heilongjiang University, 150080 Harbin P. R. China.*

*Tel: +86-451-86604330;*

*Fax: +86-451-86661259;*

*E-mail address: [fuhg@vip.sina.com](mailto:fuhg@vip.sina.com); [zyren@hlju.edu.cn](mailto:zyren@hlju.edu.cn).*

## **Experimental section**

### ***Materials.***

$\text{Co}(\text{NO}_3)_2 \cdot 6\text{H}_2\text{O}$  and  $\text{NH}_3 \cdot \text{H}_2\text{O}$  were obtained from Beijing Chemical Reagents. Ethanol and toluene were obtained from Longxi Chemical Corp. OA (99%) was obtained from Aladdin Chemistry Co. Carbon fiber papers (TGP-H-060) was obtained from Toray. All of the reagents and solvents were analytical grade and used as received without further purification.

### ***Synthesis of $[\text{Co}(\text{NH}_3)_n]^{2+}$ -OA complexes by phase-transfer.***

In a typical experimental procedure, briefly, 0.75 mmol of  $\text{Co}(\text{NO}_3)_2 \cdot 6\text{H}_2\text{O}$  was dispersed in 40 mL of deionized water by ultrasonication. An equal volume of ethanol containing 3 mL of OA and 1.5 mL of  $\text{NH}_3 \cdot \text{H}_2\text{O}$  were added. After stirring for 3 min, 40 mL of toluene was added and stirred for 5 min. Then, the mixture was transferred to a separatory funnel and left stationary for at least 10 minutes. The toluene layer with dark green in the upper, containing  $[\text{Co}(\text{NH}_3)_n]^{2+}$ -OA complexes, was removed and used in the next step.

### ***The Synthesize of OA-Stabilized $\text{Co}_3\text{O}_4$ NCs.***

Typically, 38 mL of the obtained solution was transferred to 40 mL autoclave, and then kept at 170 °C for 3 h. After the autoclave cooled down to room temperature, ethanol was added to precipitate the product. To remove the byproducts and unreacted precursors, the product was washed three times, and re-dispersed in 10 mL toluene, denoted as OA- $\text{Co}_3\text{O}_4$  NCs. The OA- $\text{Co}_3\text{O}_4$  NCs colloidal was stored at room temperature as NCs ink. As a control, OA- $\text{Co}_3\text{O}_4$  NCs was calcinated at 300 °C in the air to remove the surface OA, denoted as calcinated  $\text{Co}_3\text{O}_4$  NCs.

### ***Physical characterization.***

The morphology of the products was analyzed using transmission electron microscopy (TEM, JEOL JEM-3010) with an acceleration voltage of 300 kV. Carbon-coated copper grids were used as sample holders for TEM analysis. X-ray diffraction

(XRD) patterns were obtained by a Bruker D8 ADVANCE diffractometer by using Cu K $\alpha$  radiation ( $\lambda = 1.5406 \text{ \AA}$ ). Thermogravimetric (TG) and differential scanning calorimetry (DSC) were performed on a TA Q600 under a stream of air at a heating rate of  $10 \text{ }^\circ\text{C}\cdot\text{min}^{-1}$ . Fourier transform infrared (FT-IR) spectra were recorded on a Nicolet IS10 spectrometer. The concentration of Co ion were analyzed using Inductively Coupled Plasma Optical Emission Spectrometer (ICP-OES, Optima 700 DV, PerkinElmer).

### ***Electrochemical measurements.***

***Sample Preparation for Electrochemical Characterizations:*** The working electrodes, OA-Co<sub>3</sub>O<sub>4</sub> NCs printing on carbon fiber paper, were prepared using an airbrush (KUSING BD-130, 0.5 mm) operated at  $\sim 15\text{-}20$  psig of head pressure. Briefly, 5 mL of OA-Co<sub>3</sub>O<sub>4</sub> NC ink was sprayed on 8 cm<sup>2</sup> of carbon fiber paper. The carbon fiber paper with OA-Co<sub>3</sub>O<sub>4</sub> NCs was cut apart into smaller pieces (about 1 cm<sup>2</sup>), and immersed in 1 M KOH solution to remove OA, denoted as Co<sub>3</sub>O<sub>4</sub> NCs print carbon paper. The treated carbon fiber paper was used as working electrode, denoted as Co<sub>3</sub>O<sub>4</sub> NCs. In order to ensure the amount of Co<sub>3</sub>O<sub>4</sub> NCs on carbon fiber paper, 1cm<sup>2</sup> of working electrode was cut off, and immersed in 10 mL of HCl (0.01M) for 1h. The Co ion concentration in the solution is measured by ICP-OES, which is to calculate the quantity of Co<sub>3</sub>O<sub>4</sub> NCs. The mass of Co<sub>3</sub>O<sub>4</sub> NCs on carbon paper was about 0.35 mg cm<sup>-2</sup>. Other three kinds of electrodes, named as calcinated Co<sub>3</sub>O<sub>4</sub> NCs, and commercial Pt/C, were prepared by spray corresponding suspension ink (5 mg catalytic per 5 ml ethanol) on 8 cm<sup>2</sup> of carbon fiber paper, then 1 cm<sup>2</sup> carbon fiber paper cut as working electrode.

***Electrochemical Characterizations:*** Electrochemical studies were carried out in a standard three electrode system controlled by a VersaSTAT 3 electrochemistry workstation. A typical three-electrode experimental cell equipped with a Pt-foil having 2 cm<sup>2</sup> of surface area as the counter electrode and Hg/HgO as the reference electrode. The reference was calibrated against and converted to reversible hydrogen electrode (RHE). Each catalyst electrode was immersed in 1 M KOH for two days to

remove OA, and cycled ~50 times by cyclic voltammetry (CV) at a scan rate of 50 mVs<sup>-1</sup>, until a stable CV curve was developed before measuring. linear sweep voltammetry (LSV) was carried out at 5 mVs<sup>-1</sup> for the polarization curves. Chronopotentiometry and chronoamperometry were carried out under a serial constant current density of 10 mAcm<sup>-2</sup> (or -10 mAcm<sup>-2</sup>) for 1 h, a serial constant operating potential at 1.55 V (or -0.38V) for 1 h. Other three kinds of electrodes were also investigated in same condition. All the tests were carried out at room temperature (about 25°C).

***Tafel slope calculation of the catalysts:*** These Tafel plots were fit to the Tafel equation ( $\eta = b \log(j/j_0)$ ), where  $\eta$  is the potential,  $b$  is the Tafel slope,  $j$  is the current density, and  $j_0$  is the exchange current density.)<sup>[1]</sup>

## Results and discussion

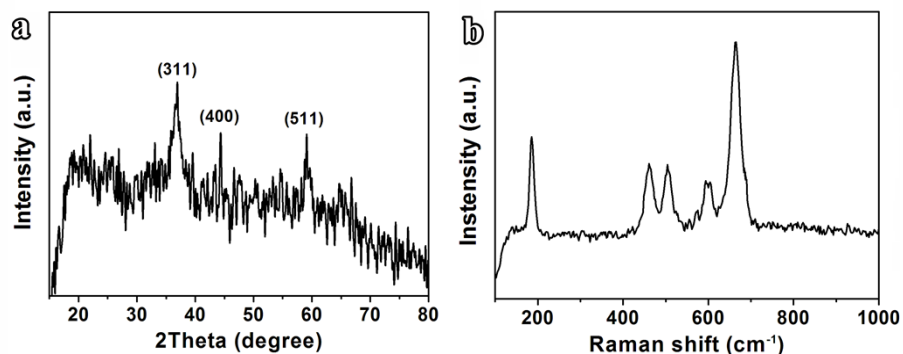

Fig. S1 (a) XRD pattern and (b) Raman spectrum of Co<sub>3</sub>O<sub>4</sub> NCs.

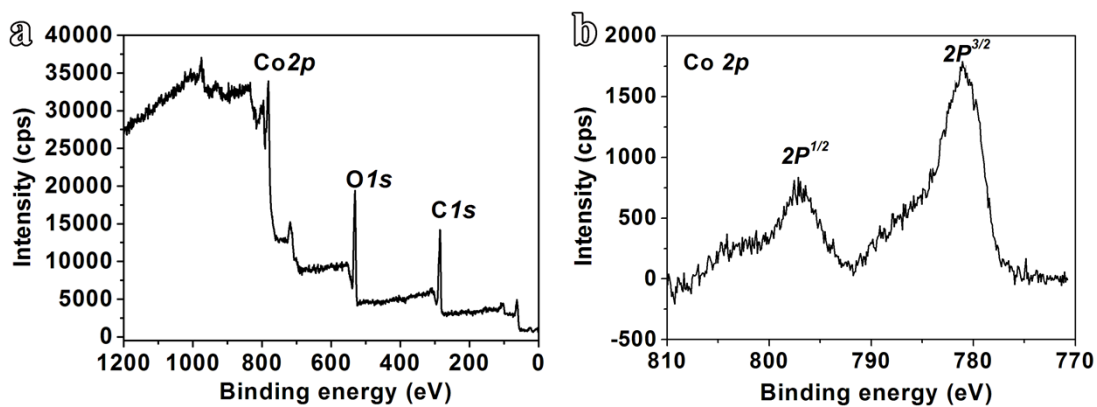

Fig. S2 XPS spectra of Co<sub>3</sub>O<sub>4</sub> NCs, (a) survey spectrum, (b) high-resolution XPS spectra of Co 2p.

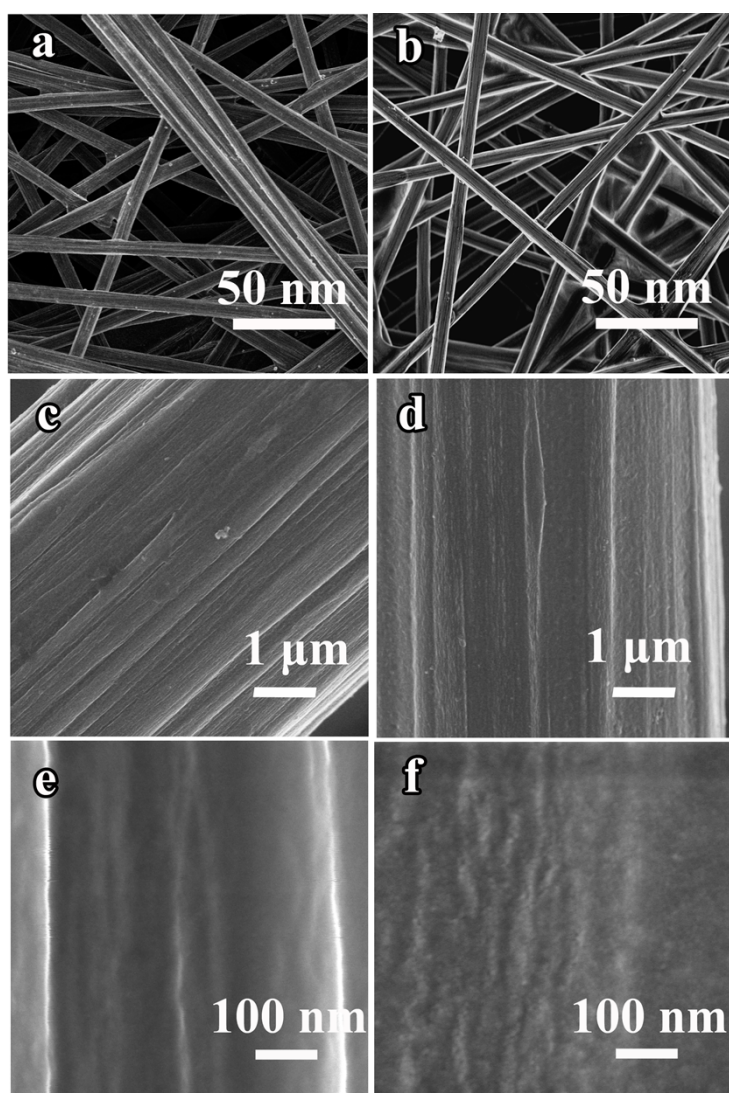

**Fig. S3** The SEM and high-magnification SEM images of carbon fiber paper before (a, c, e), and after printing  $\text{Co}_3\text{O}_4$  NCs (b, d, f).

$\text{NH}_3$  and OA play an important role for the formation of  $[\text{Co}(\text{NH}_3)_n]^{2+}$ -OA complexes in toluene solution. Fig. S4 shows the phase-transfer photos of  $[\text{Co}(\text{NH}_3)_n]^{2+}$ -OA complexes. When the system is no ammonia, the pink Co ions only exist in the water phase, indicating that Co ions cannot coordinate with OA directly (Fig. S4a). In contrast, when the system is no OA, the water phase appears green, due to the formation of coordination complexes of cobalt ions and  $\text{NH}_3$  ( $[\text{Co}(\text{NH}_3)_n]^{2+}$ ) (Fig. S4b). Apparently,  $[\text{Co}(\text{NH}_3)_n]^{2+}$  cannot transfer to toluene phase without OA assistance.

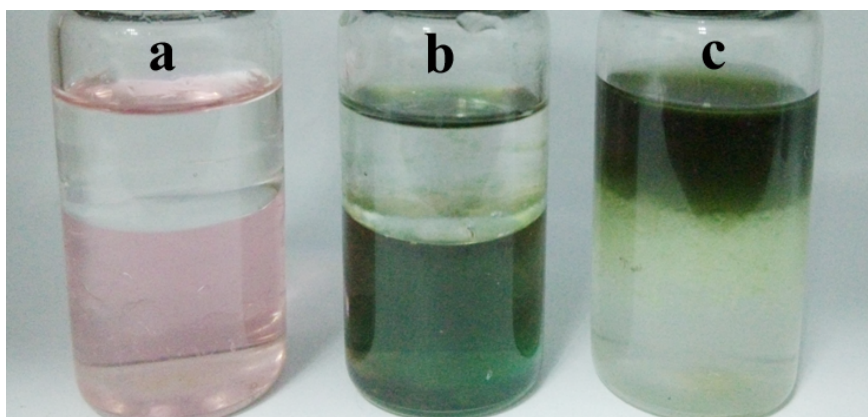

**Fig. S4** The phase-transfer photos of  $[\text{Co}(\text{NH}_3)_n]^{2+}$ -OA complex, (a) without  $\text{NH}_3$ , (b) without OA, and (c)  $[\text{Co}(\text{NH}_3)_n]^{2+}$ -OA complex in toluene phase (the upper phase is toluene and bottom phase is water and ethanol).

The FT-IR spectra of OA- $\text{Co}_3\text{O}_4$  NCs and  $[\text{Co}(\text{NH}_3)_n]^{2+}$ -OA complexes are showed in Fig. S5. In the spectrum of  $[\text{Co}(\text{NH}_3)_n]^{2+}$ -OA complexes, the strong stretching regions of C-N and N-H indicated  $\text{Co}^{2+}$  bounded by the  $\text{NH}_3$ .<sup>[2]</sup> In contrast, the peaks of C-N and N-H were disappeared in OA- $\text{Co}_3\text{O}_4$  NCs, indicating that  $\text{NH}_3$  was released during the synthesis of OA- $\text{Co}_3\text{O}_4$  NCs.

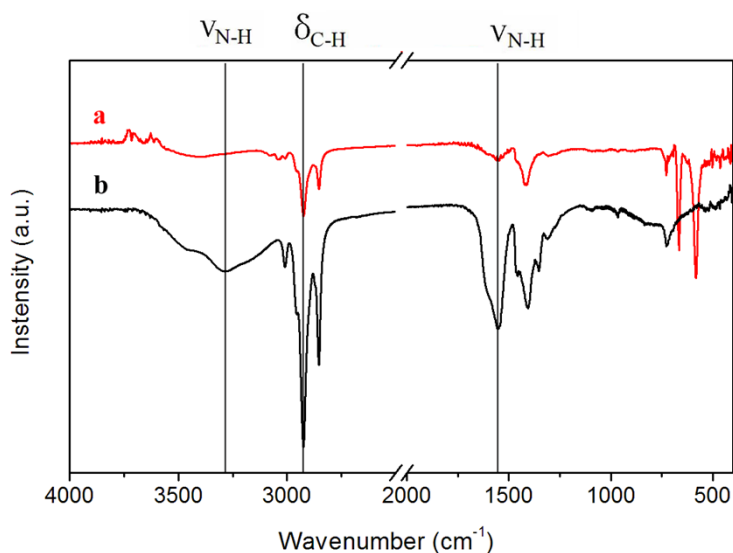

**Fig. S5** The FT-IR spectra of OA- $\text{Co}_3\text{O}_4$  NCs (a) and  $[\text{Co}(\text{NH}_3)_n]^{2+}$ -OA complex (b).

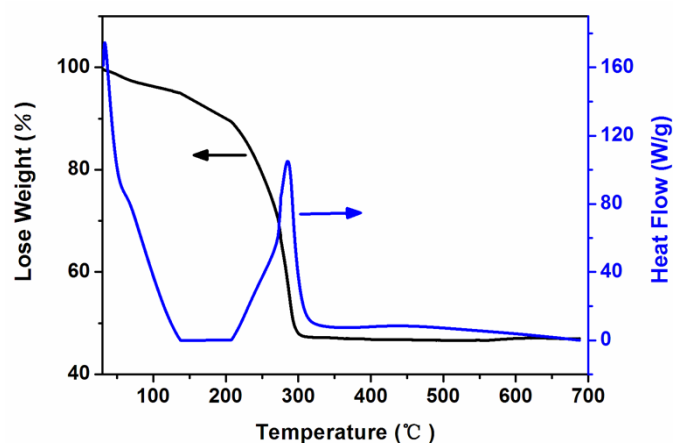

Fig. S6 TG and DSC curves of OA-Co<sub>3</sub>O<sub>4</sub> NCs.

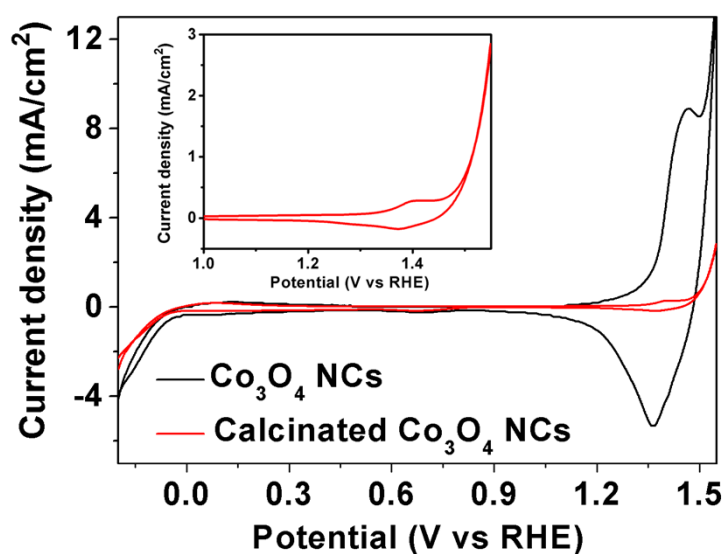

Fig. S7 *iR*-corrected CV plots of Co<sub>3</sub>O<sub>4</sub> NCs and calcinated Co<sub>3</sub>O<sub>4</sub> NCs on carbon fiber paper electrodes at a loading of 0.35 mg cm<sup>-2</sup> in 1 M KOH (The inset is the enlarged CV plot of calcinated Co<sub>3</sub>O<sub>4</sub> NCs).

Table S1. Comparison of catalytic performance of Co<sub>3</sub>O<sub>4</sub> NCs on carbon fiber paper to reported Co-based catalysts

| Catalyst                                         | Catalyst amount (mg cm <sup>2</sup> ) | Electrode          | Over potential (mV vs.RHE)/current density (mA cm <sup>2</sup> ) (OER or HER) | Electrolyte                          | Ref. |
|--------------------------------------------------|---------------------------------------|--------------------|-------------------------------------------------------------------------------|--------------------------------------|------|
| Co <sub>3</sub> O <sub>4</sub> /N-rGO            | 1                                     | GCE <sup>[1]</sup> | 155/10 (OER)                                                                  | 1 M KOH                              | 3    |
| N-CG-CoO                                         | 0.71                                  | GCE <sup>[1]</sup> | 157/10 (OER)                                                                  | 1 M KOH                              | 4    |
| Zn <sub>x</sub> Co <sub>3-x</sub> O <sub>4</sub> | 1                                     | Ti Foil            | 155/10 (OER)                                                                  | 1 M KOH                              | 5    |
| CoP/CNT                                          | 0.285                                 | GCE <sup>[1]</sup> | 122/(-10) (HER)                                                               | 1.0 M H <sub>2</sub> SO <sub>4</sub> | 6    |
| CoS <sub>2</sub> /RGO                            | 1.15                                  | GCF <sup>[2]</sup> | 313/(-20) (HER)                                                               | 0.5 M H <sub>2</sub> SO <sub>4</sub> | 7    |



|                                    |      |                    |                                    |                                                 |           |
|------------------------------------|------|--------------------|------------------------------------|-------------------------------------------------|-----------|
| CoSe <sub>2</sub> NP               | No   | CFP <sup>[3]</sup> | 155/(-20) (HER)                    | 0.5 M H <sub>2</sub> SO <sub>4</sub>            | 8         |
| Co-NRCNTs                          | 0.28 | GCE <sup>[1]</sup> | 260/(-10) (HER)<br>370/(-10) (HER) | 0.5 M H <sub>2</sub> SO <sub>4</sub><br>1 M KOH | 9         |
| CoO <sub>x</sub> @CN               | 0.12 | Ni foam            | 149/10 (OER)<br>232/(-10) (HER)    | 1M KOH                                          | 10        |
| Co <sub>3</sub> O <sub>4</sub> NCs | 0.35 | CFP <sup>[2]</sup> | 155/10 (OER)<br>380/(-10) (HER)    | 1 M KOH                                         | This work |

[1] GCE, abbreviation for glassy carbon electrode;

[2] GCF, abbreviation for Graphene/Carbon Nanotube film;

[3] CFP, abbreviation for carbon fiber paper.

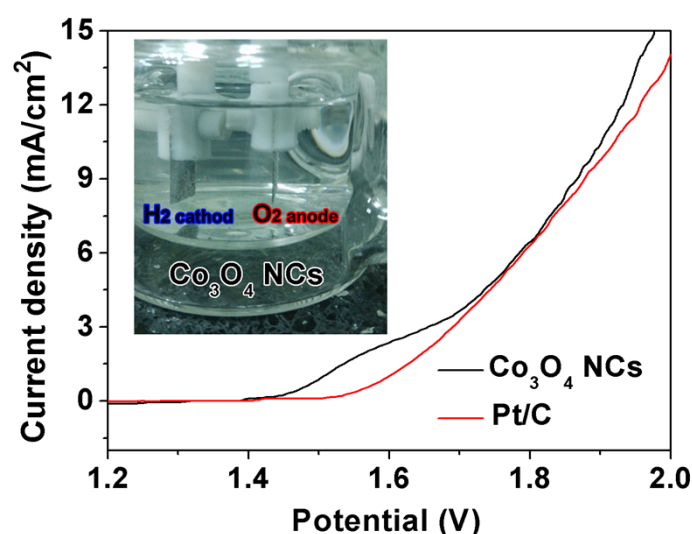

**Fig. S8** LSV plots of overall water splitting using Co<sub>3</sub>O<sub>4</sub> NCs, Pt/C on carbon fiber paper electrodes at a loading of 0.35 mg cm<sup>-2</sup> in 1 M KOH.

### Additional References

1. Schultze J. W. Sergio Trasatti (Ed.): *Electrodes of Conductive Metallic Oxides*, Part A. Elsevier Scientific Publishing Company, Amsterdam, New York 1980.
2. J. Yang, H. S. Shana, O. K. Shana, Y. Y. Jackie, *Nat. Mater.*, 2009, **8**, 683-689.
3. Y. Liang, Y. Li, H. Wang, J. Zhou, J. Wang, T. Regier, H. Dai, *Nat. Mater.*, 2011, **10**, 780.
4. S. Mao, Z. Wen, T. Huang, Y. Hou, J. Chen, *Energy Environ. Sci.*, 2014, **7**, 609-616.
5. X. Liu, Z. Chang, L. Luo, T. Xu, X. Lei, J. Liu, X. Sun, *Chem. Mater.*, 2014, **26**, 1889-1895.
6. Q. Liu, J. Tian, W. Cui, P. Jiang, N. Cheng, A. M. Asiri, X. Sun, *Angew. Chem.*

*Int. Ed.*, 2014, **53**, 6710 -6714.

7. S. Peng, L. Li, X. Han, W. Sun, M. Srinivasan, S. G. Mhaisalkar, F. Cheng, Q. Yan, J. Chen, S. Ramakrishna, *Angew. Chem. Int. Ed.*, 2014, **53**, 12594-12599.
8. D. Kong, H. Wang, Z. Lu, Y. Cui, *J. Am. Chem. Soc.*, 2014, **136**, 4897-4900.
9. X. Zou, X. Huang, A. Goswami, R. Silva, R. B. Sathe, E. Mikmekova, T. Asefa. *Angew. Chem. Int. Ed.*, 2014, **53**, 4372-4376.
10. H. Jin, J. Wang, D. Su, Z. Wei, Z. Pang, Y. Wang, *J. Am. Chem. Soc.*, 2015, **137**, 2688-2694.
